# Supplementary material
Source: publisher figshare collection journal article supplement (https://rs.figshare.com/ndownloader/files/14107700)

**A**

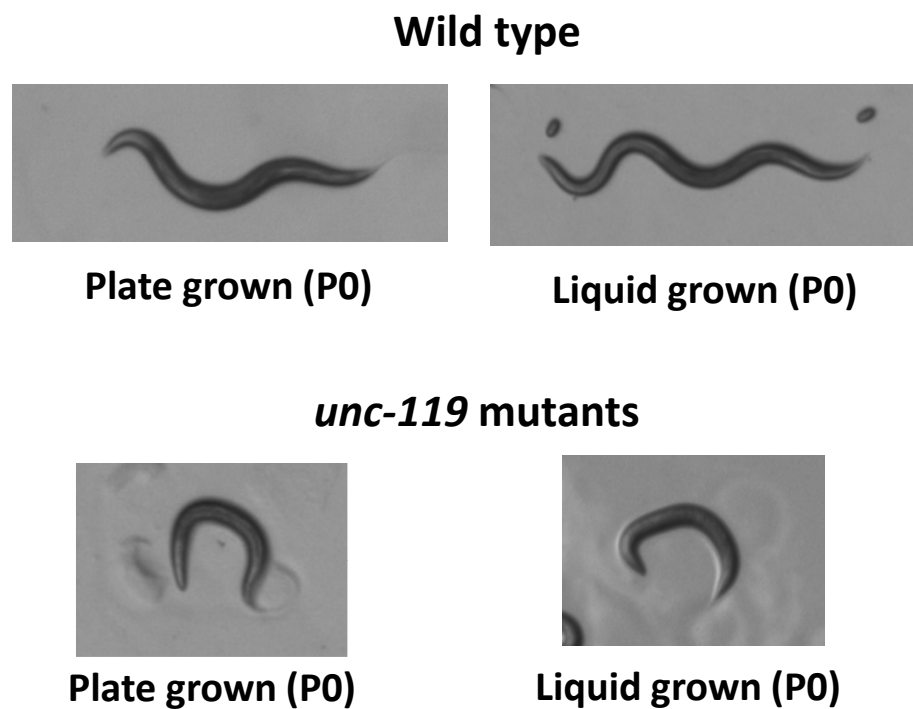

**B**

***unc-119* mutants - parental generation**

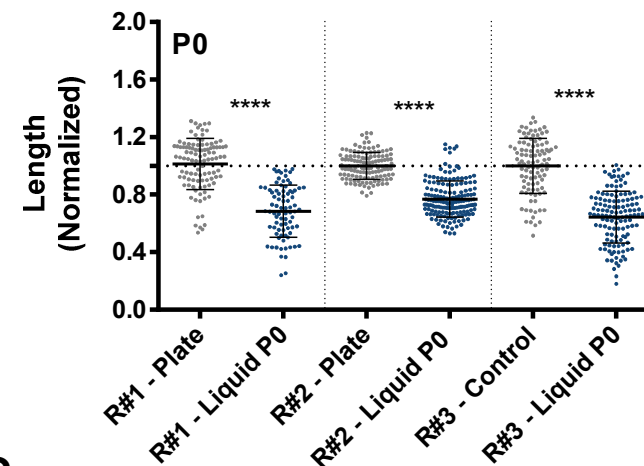

**C**

***unc-119* mutants - F1 generation**

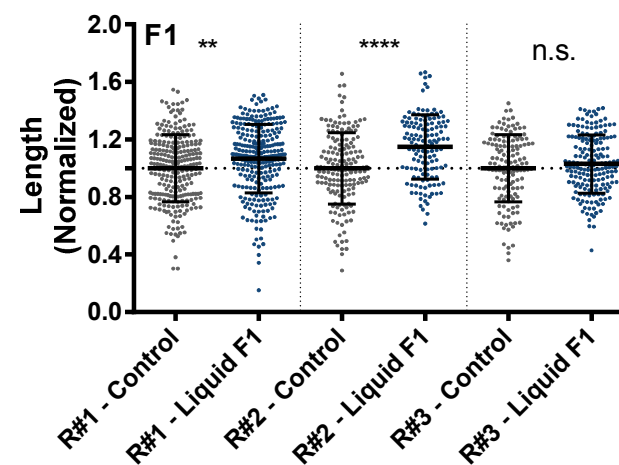

**Figure S2**

Supplement: Supplementary file 1 [file 14107700]
